# Supplementary material for: Achieving High-Energy-Density Graphene/Single-Walled Carbon Nanotube Lithium-Ion Capacitors from Organic-Based Electrolytes
Source: MDPI journal article supplement (doi:10.3390/nano14010045), 2023-12-22
Supplement: s1 [file s1]

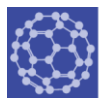

Support Information

# Achieving High-Energy-Density Graphene/Single-Walled Carbon Nanotube Lithium-Ion Capacitors from Organic-Based Electrolytes

Hang Yin <sup>1,2</sup>, Jie Tang <sup>1,2,\*</sup>, Kun Zhang <sup>1</sup>, Shiqi Lin <sup>1</sup>, Guangxu Xu <sup>1,2</sup> and Lu-Chang Qin <sup>3</sup>

<sup>1</sup> National Institute for Materials Science, 1-2-1 Sengen, Tsukuba 305-0047, Ibaraki, Japan; yin.hang@nims.go.jp (H.Y.); zhang.kun@nims.go.jp (K.Z.); lin.shiqi@nims.go.jp (S.L.); xu.guangxu@nims.go.jp (G.X.)

<sup>2</sup> Graduate School of Pure and Applied Sciences, University of Tsukuba, 1-1-1 Tennodai, Tsukuba 305-0006, Ibaraki, Japan

<sup>3</sup> Department of Physics and Astronomy, University of North Carolina at Chapel Hill, Chapel Hill, NC 27599-3255, USA; lcqin@email.unc.edu

\* Correspondence: tang.jie@nims.go.jp; Tel.: +81-02-98592728

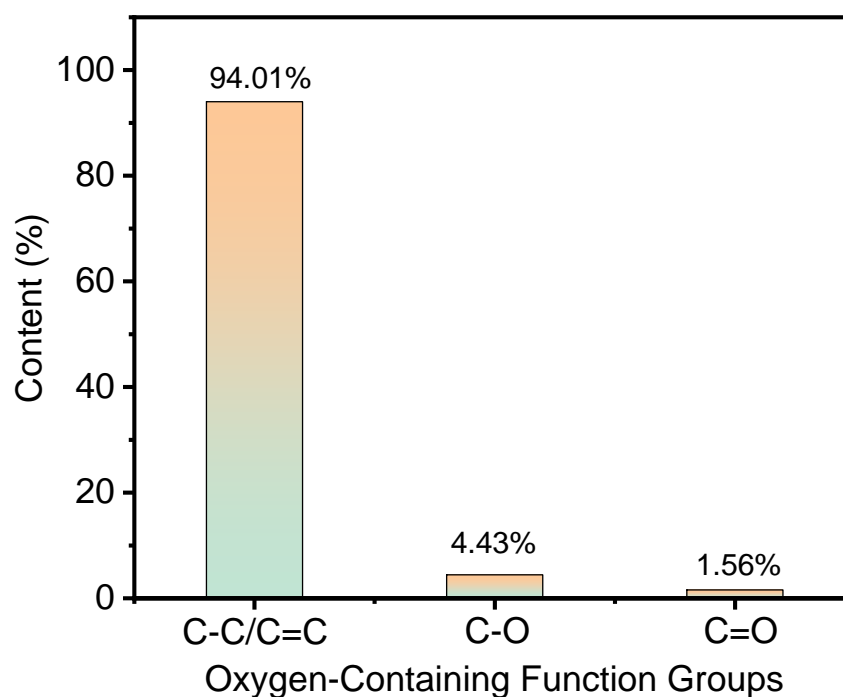

Figure S1. The specific relative contents of each chemical bond of graphene/SWCNT.

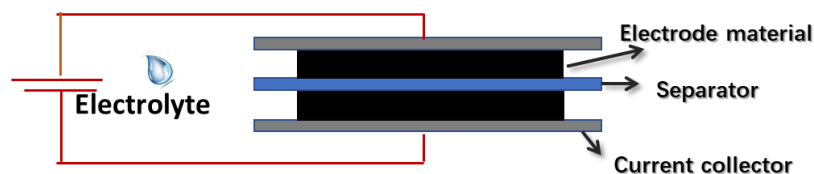

Figure S2. Schematic diagram of symmetrical capacitor structure.

**Table S1.** Specific capacitance of LIC in different electrolytes with different current densities.

| Current Density (A/g) | LiPF <sub>6</sub><br>(F/g) | LiFSI<br>(F/g) | LiBETI<br>(F/g) |
|-----------------------|----------------------------|----------------|-----------------|
| 0.1                   | 68                         | 62             | 85              |
| 0.2                   | 59                         | 57             | 78              |
| 0.5                   | 50                         | 49             | 70              |
| 1.0                   | 46                         | 42             | 62              |
| 2.0                   | 44                         | 37             | 53              |
| 5.0                   | 41                         | 34             | 48              |

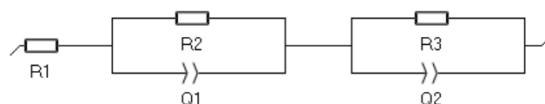**Figure S3.** LIC fitting equivalent circuit in LiBETI electrolyte.

Equivalent circuit:

$$R1 + R2/Q1 + R3/Q2$$

$$R1 = 7.199 \times 10^{-45} \text{ Ohm}$$

$$R2 = 17.64 \times 10^{-15} \text{ Ohm}$$

$$Q1 = 59.44 \times 10^{-6} \text{ F} \cdot \text{s}^{(a-1)}$$

$$a1 = 1$$

$$R3 = 1.24 \text{ Ohm}$$

$$Q2 = 10.79 \times 10^{-21} \text{ F} \cdot \text{s}^{(a-1)}$$

$$a2 = 0.9905$$

**Table S2.** The performance of the previously reported LICs comparison to Graphene/SWCNT LIC.

| LICs                                   | Power Density<br>(W/kg) | Energy Density<br>(Wh/kg) |
|----------------------------------------|-------------------------|---------------------------|
| Graphene    Polydopamine-graphene      | 212.7                   | 137.1                     |
| Graphene    Graphene/SnO <sub>2</sub>  | 146.4                   | 186.0                     |
| O-doping graphene    O-doping graphene | 1126.4                  | 99.4                      |
| Graphene    Graphite                   | 4395.3                  | 84.4                      |
| Graphene/SWCNT    Graphite (This work) | 2678.5                  | 181.9                     |
